# Supplementary material for: Effect of main chain conformation on thermosensitivity in elastin-like peptide-grafted polylysine
Source: Royal Society of Chemistry journal article supplement (doi:10.1039/c5ra23865j), 2015-01-01
Supplement: c5ra23865j1.pdf [file c5ra23865j1.pdf]

## Effect of Main Chain Conformation to Thermosensitivity in Elastin-Like Peptide-Grafted Polylysine

Chie Kojima<sup>1\*</sup>, Ugir Hossain Sk<sup>2§</sup>, Daichi Fukushima<sup>1</sup>, Kotaro Irie<sup>2</sup>, Naotoshi Akazawa<sup>3</sup>,

Masafumi Umeda<sup>3</sup>, Takuro Niidome<sup>3</sup>

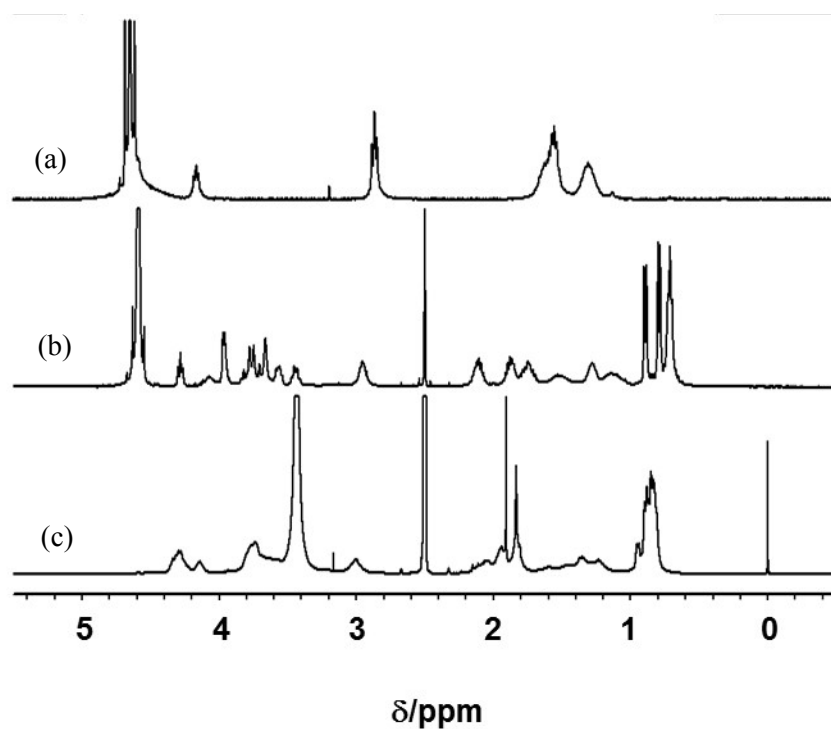

Figure S1. <sup>1</sup>H NMR spectra of PLL (a) and ELP-PLL (b) in D<sub>2</sub>O and Ac-ELP-PLL (c) in DMSO-d<sub>6</sub>.

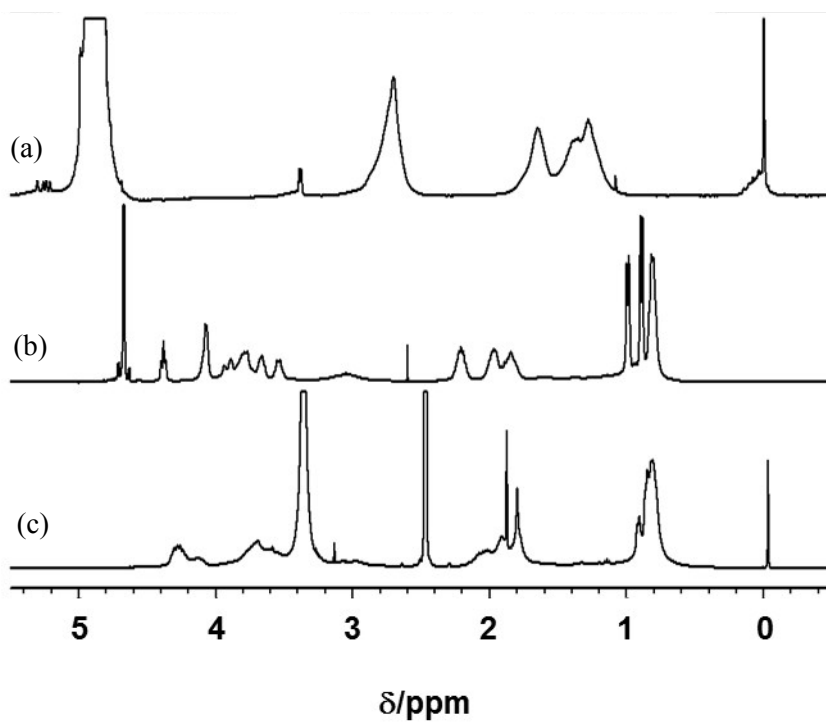

Figure S2.  $^1\text{H}$  NMR spectra of PAA-5k (a) and ELP-PAA-5k (b) in  $\text{D}_2\text{O}$  and Ac-ELP-PAA-5k (c) in  $\text{DMSO-d}_6$ .

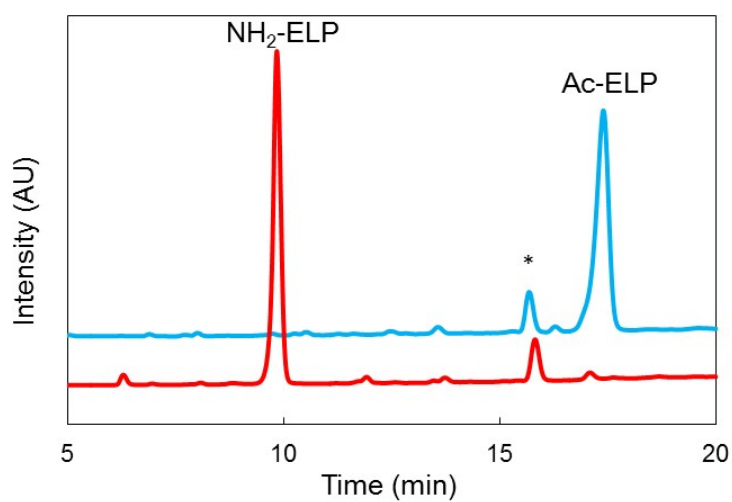

Figure S3. Chromatograms of Ac-ELP and  $\text{NH}_2$ -ELP in the reverse-phase HPLC analysis.

\*impurity.

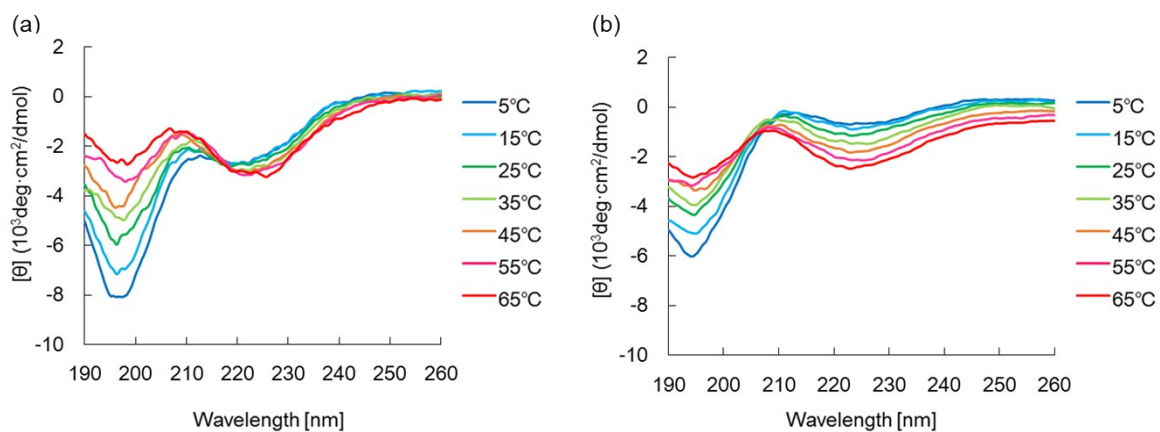

Figure S4. CD spectra of Ac-ELP-PAA-5k (a) and ELP-PAA-5k (b) in water.

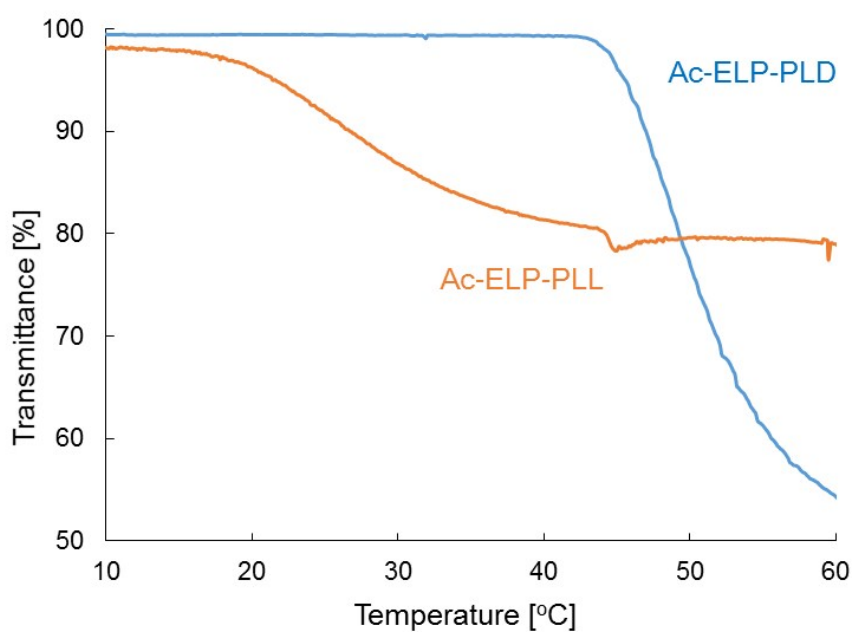

Figure S5. Temperature-dependent transmittance for solutions of the acetylated elastin-mimetic polymers in water (0.05 mg/ml).
